# Supplementary material for: The Influence of Chestnut Extract and Its Components on Antibacterial Activity against Staphylococcus aureus
Source: MDPI journal article supplement (doi:10.3390/plants12102043), 2023-05-20
Supplement: s1 [file s1]

# Plants

## Supplementary Material

### The Influence of Chestnut Extract and Its Components on Antibacterial Activity of *Staphylococcus aureus*

Sara Štumpf<sup>1</sup>, Gregor Hostnik<sup>1</sup>, Tomaž Langerholc<sup>2</sup>, Maša Pintarič<sup>2</sup>, Zala Kolenc<sup>1,2,3</sup> and Urban Bren<sup>1,3,4,\*</sup>

<sup>1</sup> Laboratory of Physical Chemistry and Chemical Thermodynamics, Faculty of Chemistry and Chemical Engineering, University of Maribor, Smetanova 17, 2000 Maribor, Slovenia

<sup>2</sup> Department of Microbiology, Biochemistry, Molecular Biology and Biotechnology, Faculty of Agriculture and Life Sciences, University of Maribor, Pivola 10, 2311 Hoče, Slovenia

<sup>3</sup> Department of Applied Natural Sciences, Faculty of Mathematics, Natural Sciences and Information Technologies, University of Primorska, Glagoljaska 8, 6000 Koper, Slovenia

<sup>4</sup> Institute of Environmental Protection and Sensors, Beloruska 7, 2000 Maribor, Slovenia

\* Correspondence: urban.bren@um.si, Tel.: +386-2-2294-421

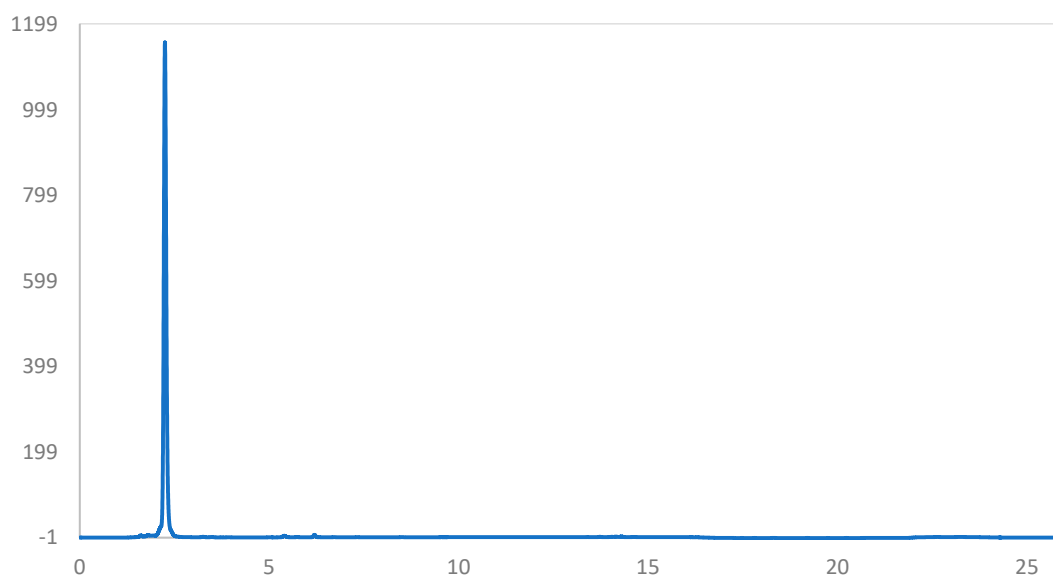

**Figure S1.** HPLC chromatogram of castalin at 280 nm.

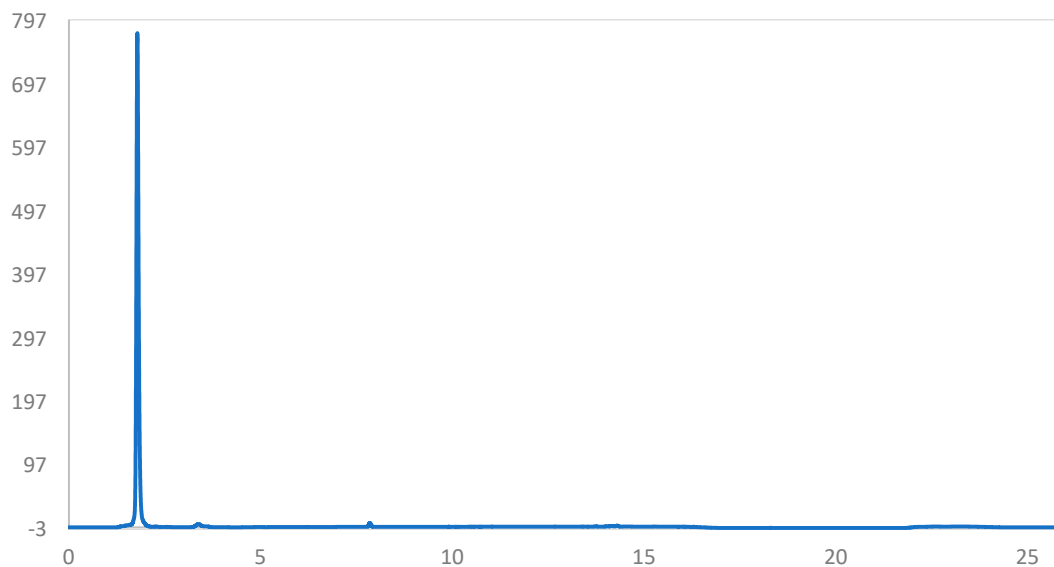

**Figure S2.** HPLC chromatogram of vescalin at 280 nm.

**Table S1.** Minimum inhibitory concentration (MIC) values of chestnut extract and its compounds in differently concentrated growth media.

|                  | 0.5                            | 0.75                 | 1                    | 1.5                  |
|------------------|--------------------------------|----------------------|----------------------|----------------------|
|                  | MIC values in $\mu\text{g/mL}$ |                      |                      |                      |
| Chestnut extract | $733.33 \pm 57.74$             | $800.00 \pm 100.00$  | $866.67 \pm 115.47$  | $1200.00 \pm 120.00$ |
| Tannic acid      | $23.33 \pm 5.77$               | $50.00 \pm 10.00$    | $60.00 \pm 0.00$     | $85.00 \pm 8.66$     |
| Gallic acid      | $2600.00 \pm 346.41$           | $4000.00 \pm 916.52$ | $5200.00 \pm 346.41$ | $5600.00 \pm 800.00$ |
| Vescalagin       | $400.00 \pm 0.00$              | $433.00 \pm 57.74$   | $533.33 \pm 57.74$   | $600.00 \pm 0.00$    |
| Castalagin       | $533.00 \pm 152.75$            | $500.00 \pm 173.21$  | $700.00 \pm 0.00$    | $866.67 \pm 57.74$   |
| Vescalin         | $300 \pm 0.00$                 | $333.33 \pm 57.74$   | $350.00 \pm 57.74$   | $566.67 \pm 57.74$   |
| Castalin         | $533.33 \pm 57.74$             | $533.00 \pm 57.74$   | $450.00 \pm 0.00$    | $733.33 \pm 230.94$  |

0.5 = half the concentration of *MHB* growth medium recommended by the producer; 0.75 = 75% of the concentration of *MHB* growth medium recommended by the producer; 1 = the concentration of *MHB* growth medium recommended by the producer; 1.5 = one and a half the concentration of *MHB* growth medium recommended by the producer.
